# Supplementary material
Source: Research Square preprint supplement (doi:10.21203/rs.3.rs-9132370/v1)
Supplement: Supplementary file 1 [file 024e06c5ae59ec5ce05c3224.docx]

| **Crop species** | **Green Seeker** | **SPAD** | **DMSO chlorophyll a** | **DMSO chlorophyll b** | **DMSO total chlorophyll** | **Acetone chlorophyll a** | **Acetone chlorophyll b** | **Acetone total chlorophyll** |
| --- | --- | --- | --- | --- | --- | --- | --- | --- |
| Strawberry | 0.5 | 52.5 | 8.6 | 7.9 | 168.8 | 11 | 6.5 | 164.5 |
| Strawberry | 0.4 | 54.1 | 8.2 | 7.6 | 162.3 | 10.5 | 6.9 | 165.1 |
| Strawberry | 0.4 | 51.7 | 10 | 6.7 | 155.8 | 9.1 | 7 | 155.2 |
| Garden pea | 0.6 | 51.6 | 8.4 | 1.9 | 97.9 | 7.7 | 1.6 | 78.7 |
| Garden pea | 0.4 | 43.1 | 8.2 | 2.2 | 100.2 | 7.5 | 1.8 | 79.8 |
| Garden pea | 0.5 | 52.8 | 7.7 | 2.1 | 100.1 | 8.1 | 3.4 | 103.7 |
| French bean | 0.5 | 45.4 | 2.6 | 0.6 | 30.8 | 11.2 | 5.5 | 153.9 |
| French bean | 0.5 | 46.3 | 4.5 | 0.6 | 41.6 | 9.3 | 4.9 | 131.9 |
| French bean | 0.6 | 43.5 | 5 | 0.8 | 66 | 11.3 | 2.9 | 122 |
| Wheat | 0.6 | 48.5 | 7.5 | 1.9 | 81.6 | 11.3 | 5.2 | 151 |
| Wheat | 0.7 | 49.9 | 6 | 1.8 | 98.5 | 11 | 4.8 | 143 |
| Wheat | 0.8 | 47.3 | 7.2 | 1.6 | 130.1 | 11.1 | 4.7 | 143.2 |
| Potato | 0.7 | 56.9 | 7.3 | 1.6 | 66 | 10.9 | 6.7 | 166.1 |
| Potato | 0.8 | 55.1 | 7.2 | 1.7 | 85.1 | 10.9 | 6.5 | 163.9 |
| Potato | 0.8 | 57.3 | 8 | 1.9 | 94.2 | 11 | 6.3 | 162.1 |
| Mustard | 0.5 | 42.5 | 10 | 1.3 | 102.1 | 10.3 | 2.5 | 110 |
| Mustard | 0.6 | 44.1 | 9.2 | 1.5 | 101.3 | 10.1 | 2.7 | 110.8 |
| Mustard | 0.6 | 40.1 | 10.2 | 1.8 | 112.9 | 10.4 | 2.6 | 112.2 |
| Sweet potato | 0.5 | 51.9 | 6.4 | 2.1 | 82.7 | 11.7 | 3.3 | 130.7 |
| Sweet potato | 0.4 | 50.7 | 5.9 | 2.3 | 80.1 | 11.6 | 3.5 | 132.5 |
| Sweet potato | 0.5 | 49.9 | 4.7 | 2.6 | 95.1 | 12.1 | 2 | 117.8 |
| Tobacco | 0.6 | 48.4 | 1.7 | 1.6 | 34 | 10.9 | 2.6 | 116 |
| Tobacco | 0.8 | 51.1 | 2.3 | 1.5 | 37.8 | 10.4 | 2.8 | 114.6 |
| Tobacco | 0.6 | 46.2 | 2.2 | 1.7 | 51.6 | 10.3 | 2.6 | 111.4 |

**Table 2 (Supplementary data): Estimation of chlorophyll using destructive and non-destructive methods in eight crop species**
